# Supplementary material for: The extended loops of ribosomal proteins uL4 and uL22 of Escherichia coli contribute to ribosome assembly and protein translation
Source: PubMed Central journal article supplement — Nucleic Acids Res. 2016 Jun 1;44(12):5798–810. doi: 10.1093/nar/gkw493 (PMC4937340; doi:10.1093/nar/gkw493), 2016-06-01
Supplement: supp_gkw493_nar-02231-r-2015-File011.pdf [file supp_gkw493_nar-02231-r-2015-File011.pdf]

Supplementary Table 1. Oligonucleotides used

| Oligo number | Sequence              | Complementary to                                                  | Used for                                                    |
|--------------|-----------------------|-------------------------------------------------------------------|-------------------------------------------------------------|
| O1686        | TACTCACCCGTCCGCCACTC  | Nucleotide 100-119 of 16S rRNA                                    | Northern probing of 16S rRNA                                |
| O1687        | AAGGTTAAGCCTCACGGTTC  | Nucleotide 2885-2904 of 23S rRNA                                  | Northern probing of 23S rRNA                                |
| O1688        | CGTATCTTCGAGTGCCACACA | Nucleotide 95-114 upstream of 16S rRNA 5' end                     | Northern probing of precursor 16S rRNA (p16S)               |
| O1689        | CGCTTAACCTCACAAAC     | Nucleotides 7 upstream-nucleotide 9 downstream of 23S rRNA 5' end | Northern probing of precursor 23S rRNA (p23S)               |
| O1918        | TCACCTTACCGACGCTTA    | 72-89 of 23S rRNA                                                 | Mapping of 5' ends of p23S and 23S rRNA by primer extension |

See Supplementary Fig. 1 for details

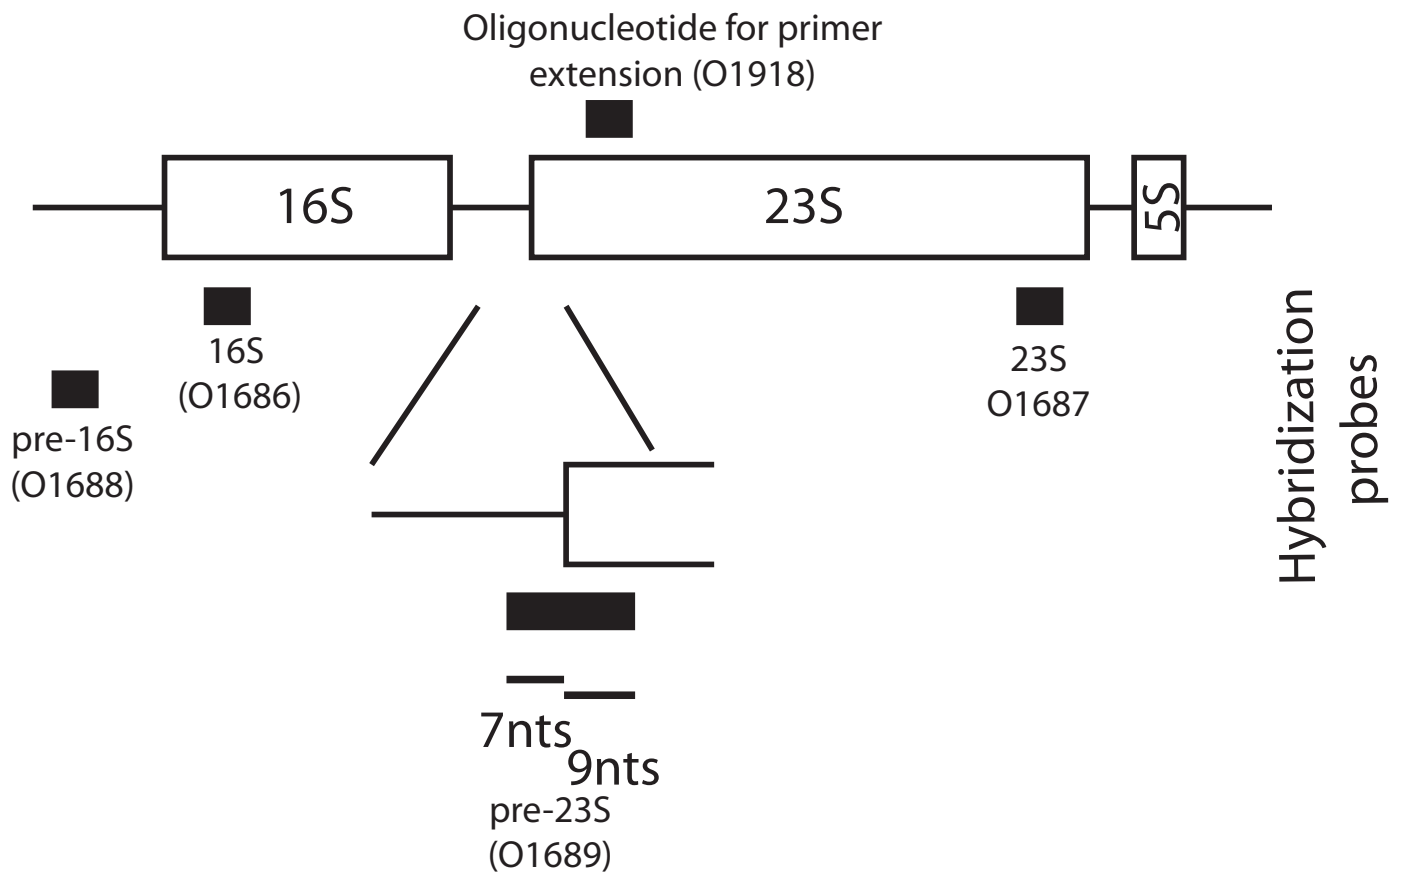

Supplementary Figure 1

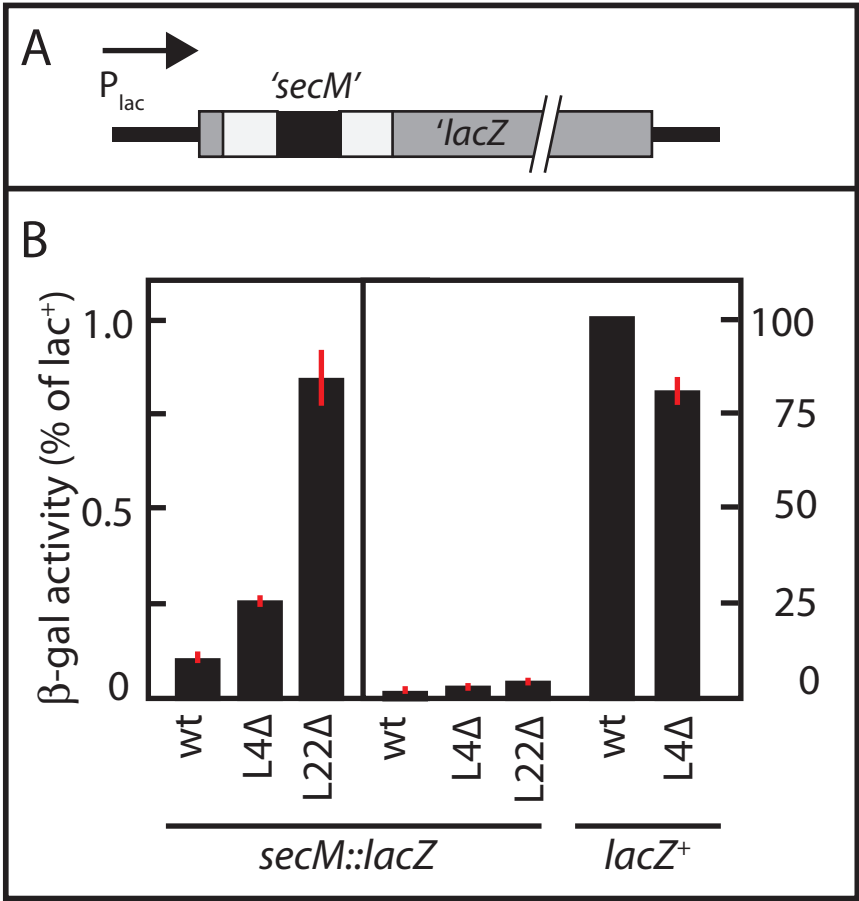

Supplementary Figure 2

## Legends to Supplementary figures

Supplementary Figure 1. Map of position of oligonucleotides with sequences complementary to specific regions of the rRNA transcription unit. The line with open boxes illustrates the *E. coli* rRNA transcription unit. The transcribed spacers (lines between and flanking the boxes) are not to scale. The map does not include tRNA genes in the spacers, because the spacer tRNA genes are not important for this work. The black boxes indicate the position and approximate length of the rRNA regions to which the oligonucleotides hybridize. The oligonucleotides were used for Northern hybridization to identify the indicated rRNA transcripts (Fig. 4B) and mapping the 5' ends of 23S rRNA transcripts by primer extension (fig. 4C-D). See Table 1 for the exact sequences of the oligonucleotides. Note that the p23S hybridization probe spans the end of the 23S rRNA sequence. Under our hybridization conditions, it hybridizes to 23S rRNA with 7-8 nucleotides 5' extensions, but not to mature 23S rRNA or 23S rRNA with shorter 5' extensions. See also text.

Supplementary Figure 2. SecM-mediated translational pausing. A. Map of construct for quantifying pausing. The construct consists of (from left to right) the *lac* promoter, N-terminal end of the *lacZ* gene (gray), a piece of pGEM5 (white box), the sequence for the SecM pausing peptide, another piece of pGEM5, and finally the remaining part of the *lacZ* gene (grey). For more details, see ref. 35. (B)  $\beta$ -galactosidase enzyme activity in the indicated strains. The averages and standard errors of the mean (red lines) of biological triplicates are shown. Three enzyme assays were done for each in duplicate.
